# Supplementary material for: Biphasic Porous Bijel-Like Structures with Hydrogel Domains as Controlled Drug Delivery Systems
Source: MDPI journal article supplement (doi:10.3390/gels10010072), 2024-01-18
Supplement: s1 [file s1]

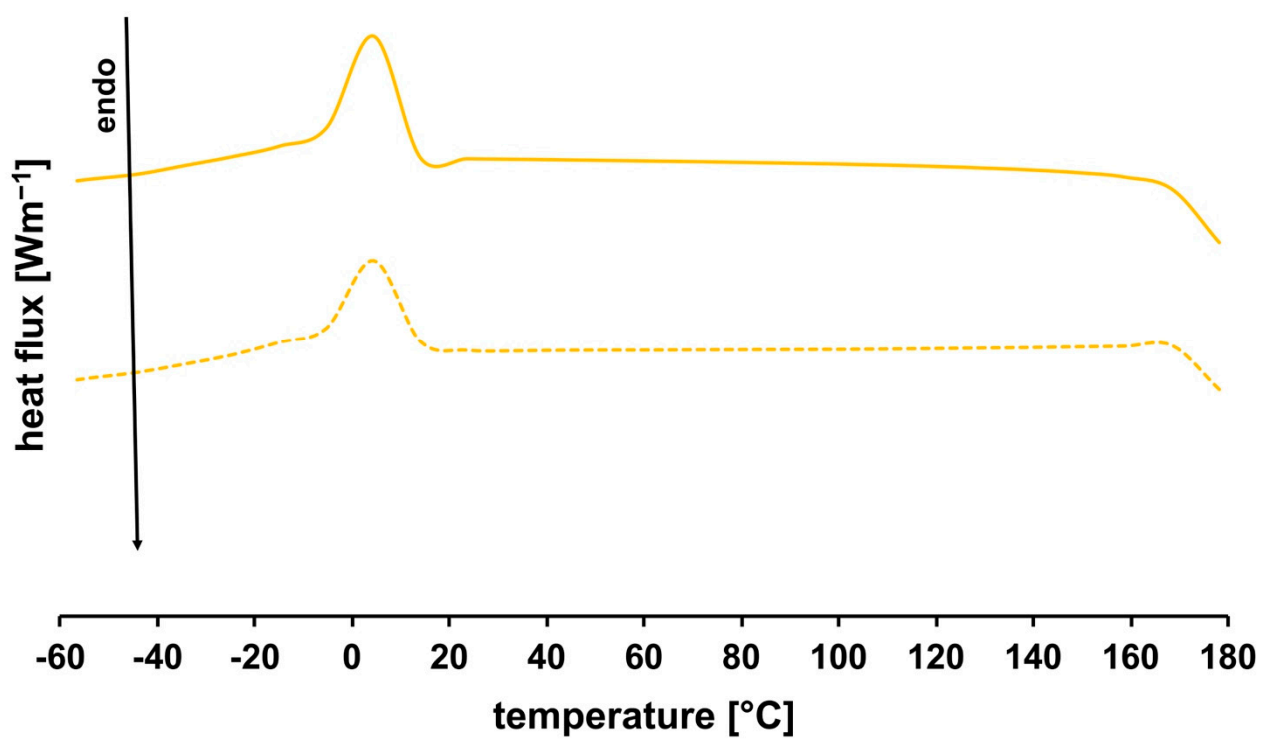

**Figure S1.** DSC thermogram of bijel-like samples: 10 mg/mL (yellow line), 20 mg/mL (yellow dotted line).

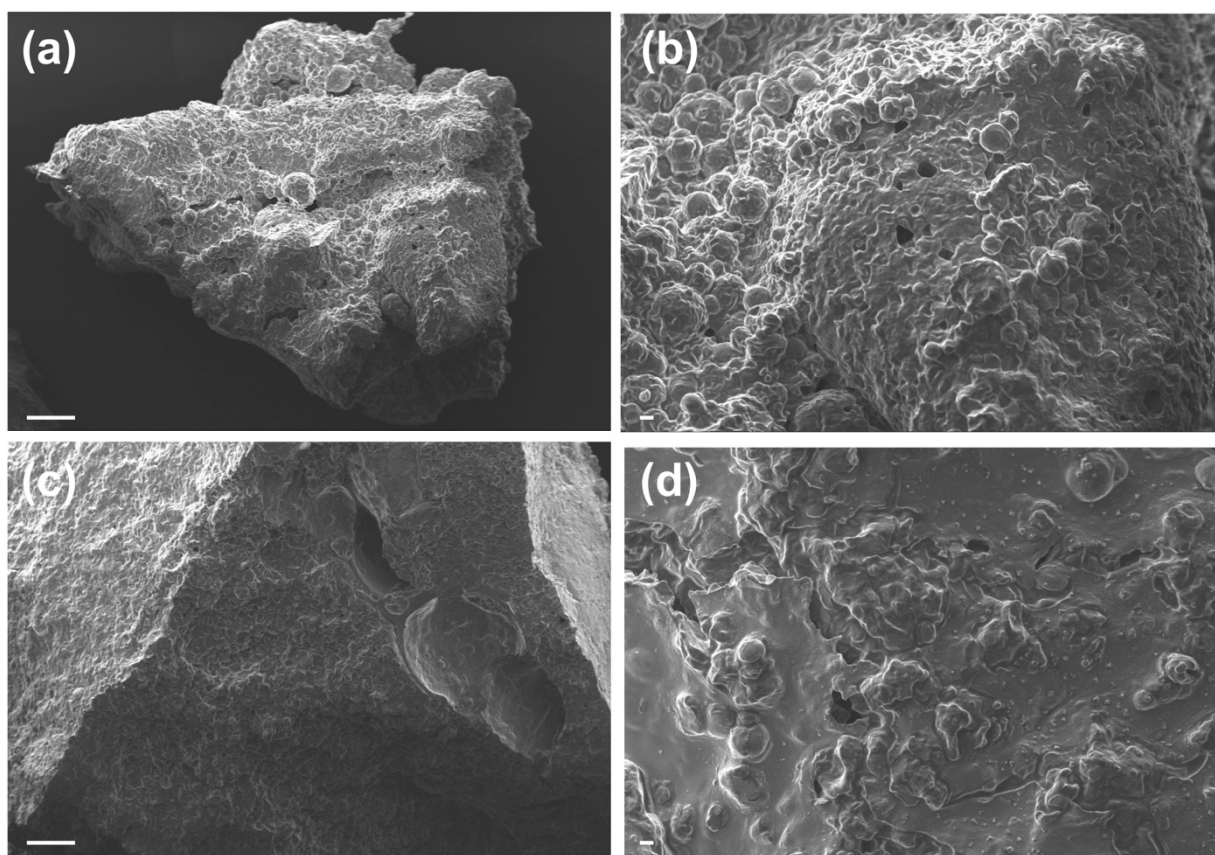

**Figure S2.** SEM images of different bijel samples. **a, b)** 20 mg/mL alginate not soaked in  $\text{CaCl}_2$  (100  $\mu\text{m}$ , **a**) (20  $\mu\text{m}$ , **b**). **c, d)** 20 mg/mL alginate 3h soaked in  $\text{CaCl}_2$  (100  $\mu\text{m}$ , **c**) (20  $\mu\text{m}$ , **d**).

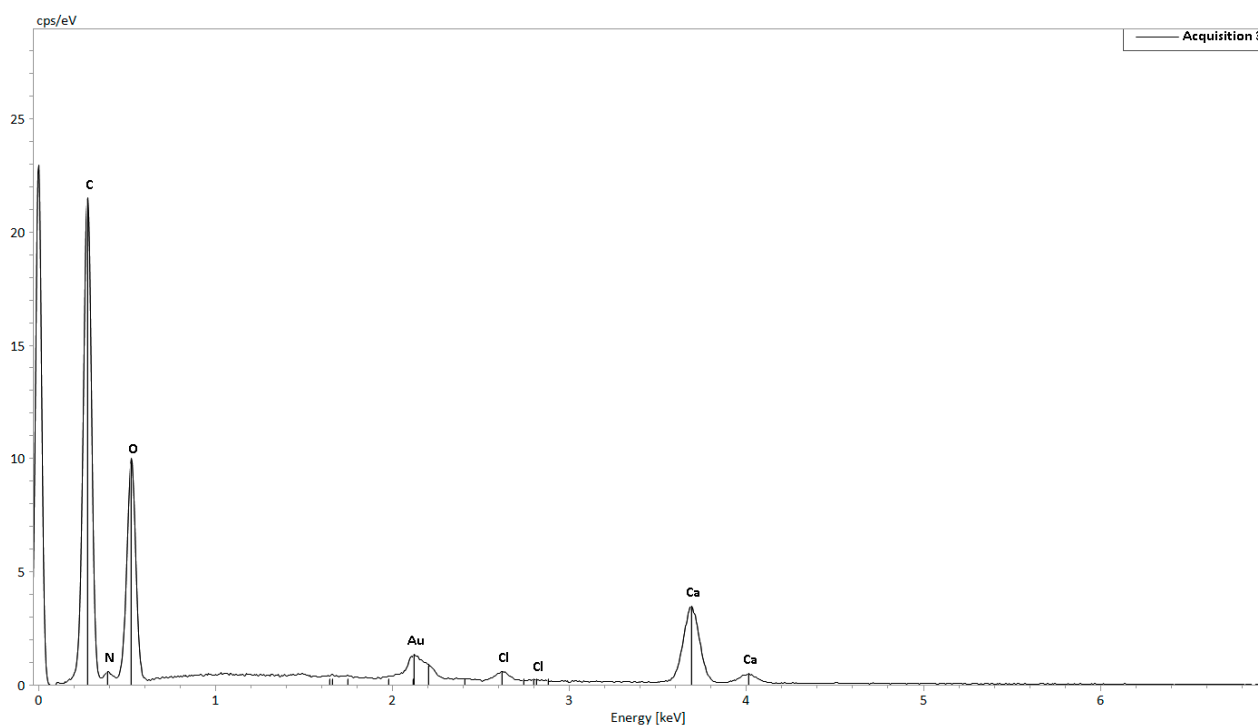

**Figure S3.** EDS analysis on bijel samples after soaking in  $\text{CaCl}_2$  solution. The peaks related to the Ca and Cl are clearly visible, ensuring that the lumps observable through SEM analysis were  $\text{CaCl}_2$  deposits.

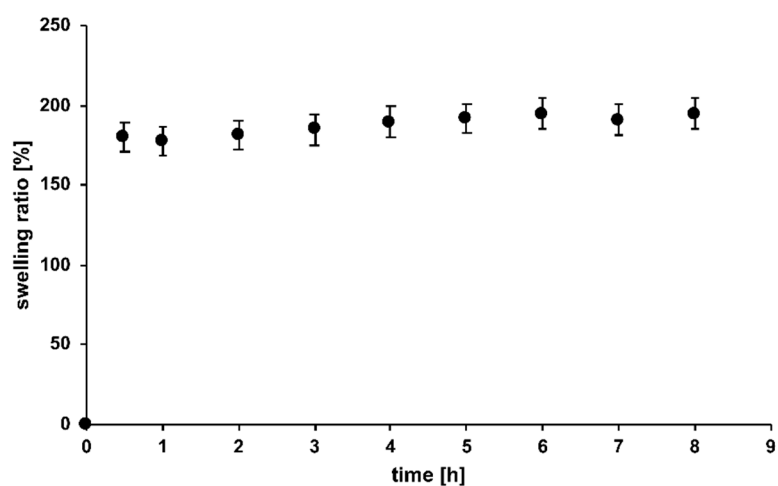

**Figure S4.** Swelling profile for dried bijel-like samples 20 mg/mL alginate.

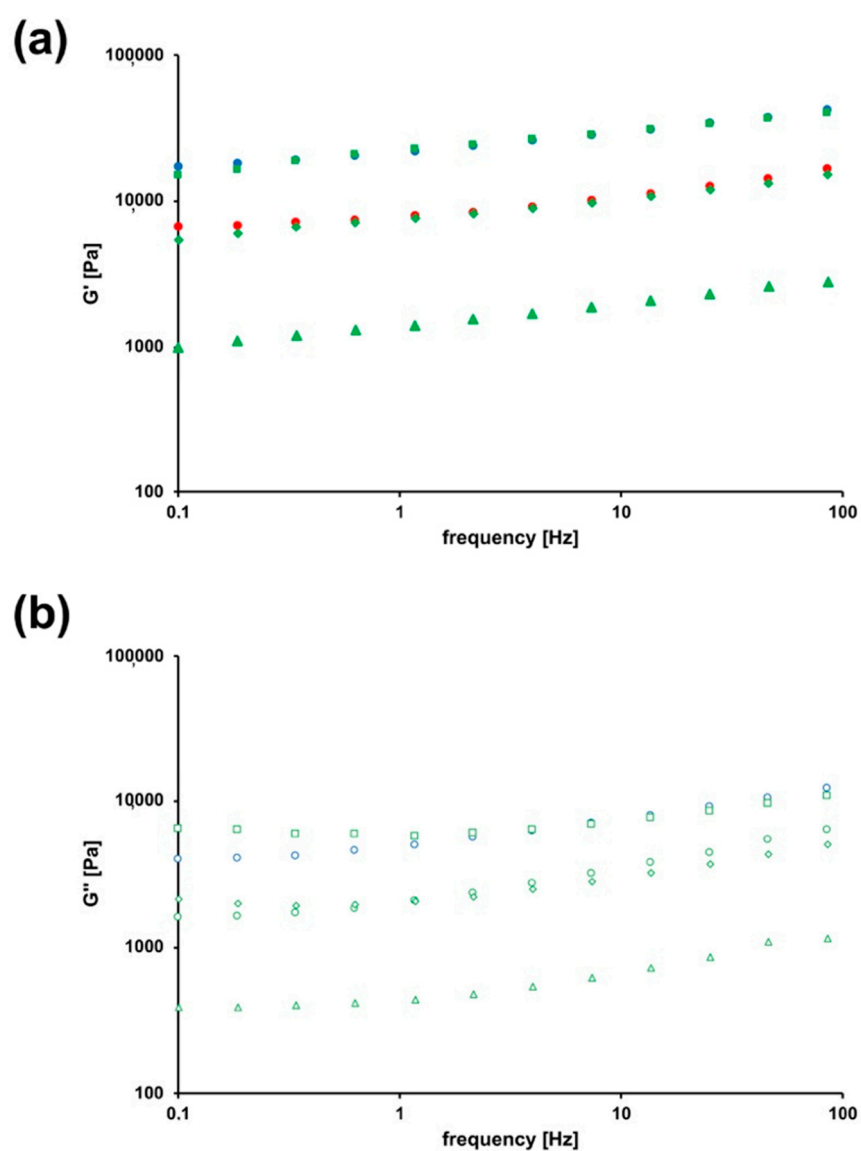

**Figure S5.** Frequency sweep tests for the 20 mg/mL samples: blank (blue circle), not soaked (red circle), 30 min soaking (green rhombuses), 3 h soaking (green squares) and 24 h soaking (green triangle).

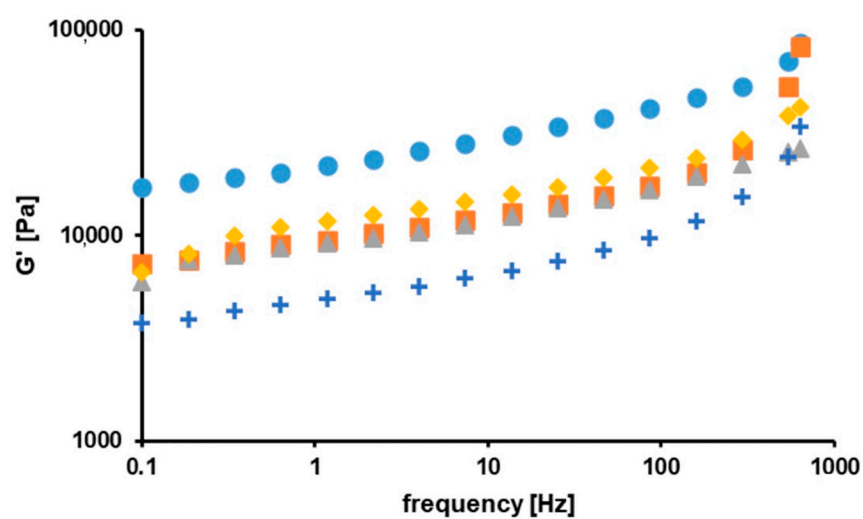

**Figure S6.** Frequency sweep tests for the 15 mg/mL sample.  $\circ$  blank,  $\square$  not soaked,  $\Delta$  30 min soaking,  $\diamond$  3 h soaking and  $+$  24 h soaking respectively.

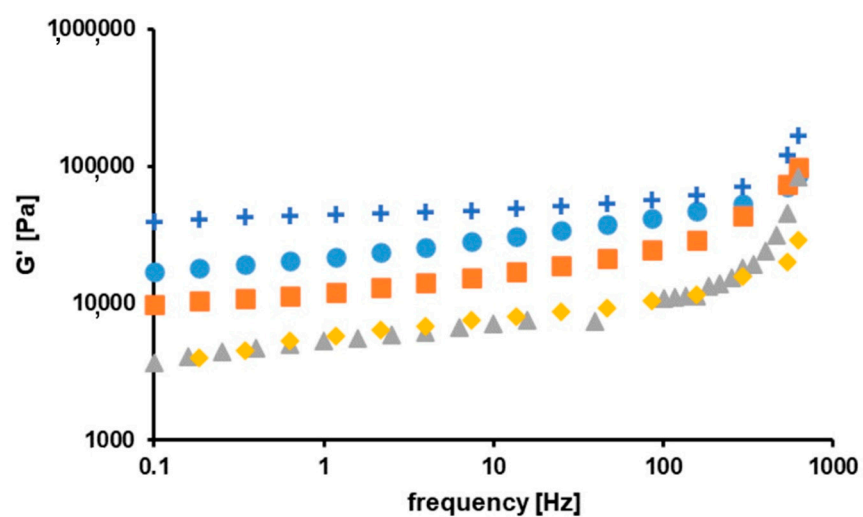

**Figure S7.** Frequency sweep tests for the 30 mg/mL sample.  $\circ$  blank,  $\square$  not soaked,  $\Delta$  30 min soaking,  $\diamond$  3 h soaking and  $+$  24 h soaking respectively.

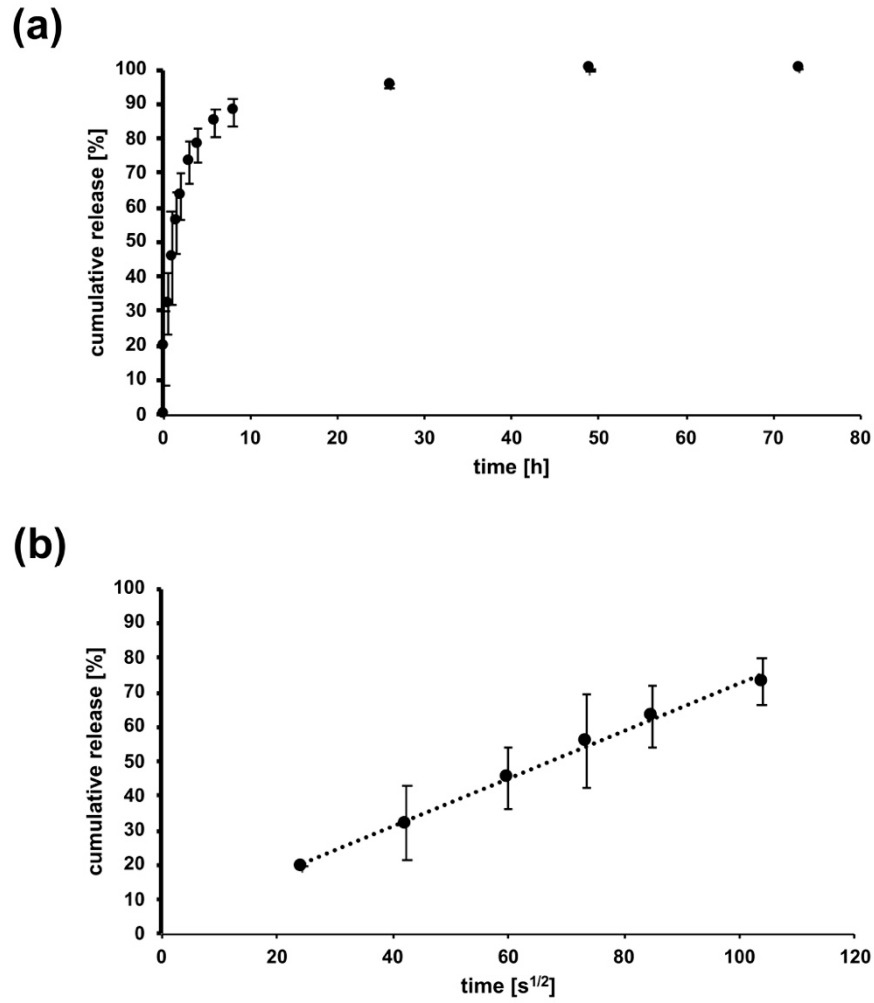

**Figure S8.** (a) Fluorescein release profile. (b) The slope of drug release against the square root of time is representative of Fickian diffusion coefficients for each sample ( $p < 0.001$  between all groups): 20 mg/mL (black circle).

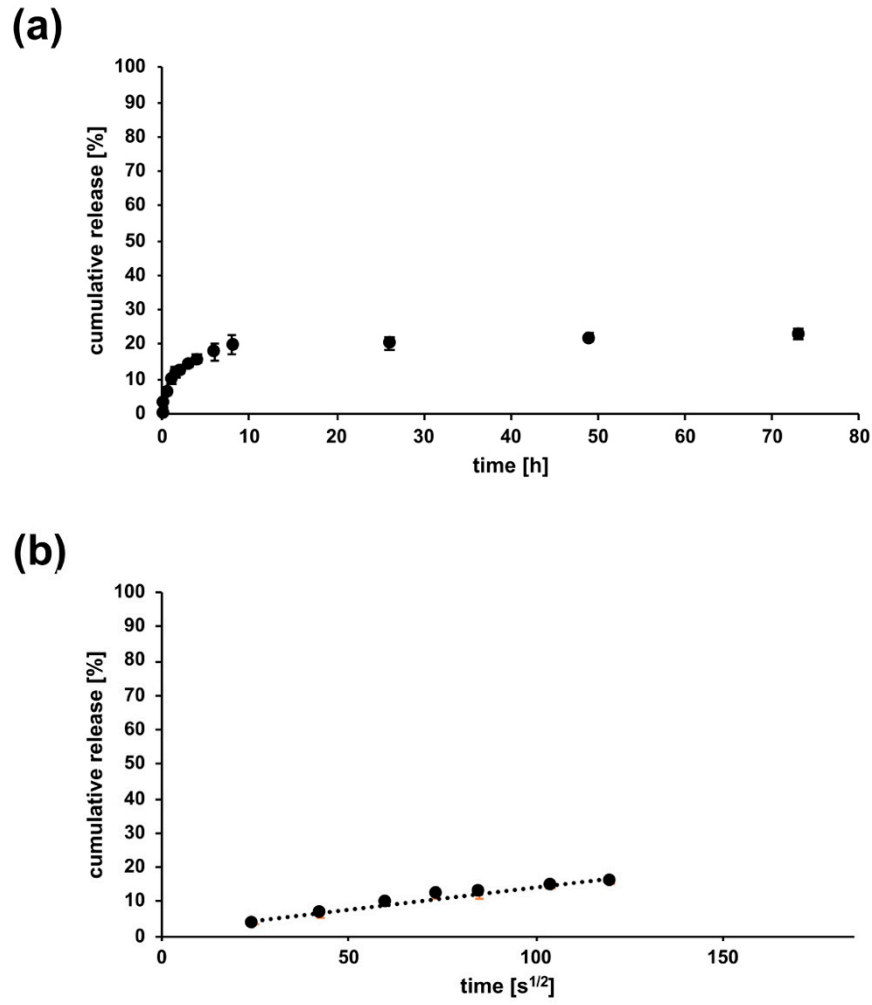

**Figure S9.** (a) Rhodamine release profile. (b) The slope of drug release against the square root of time is representative of Fickian diffusion coefficients for each sample ( $p < 0.001$  between all groups): 20 mg/mL (black circle).

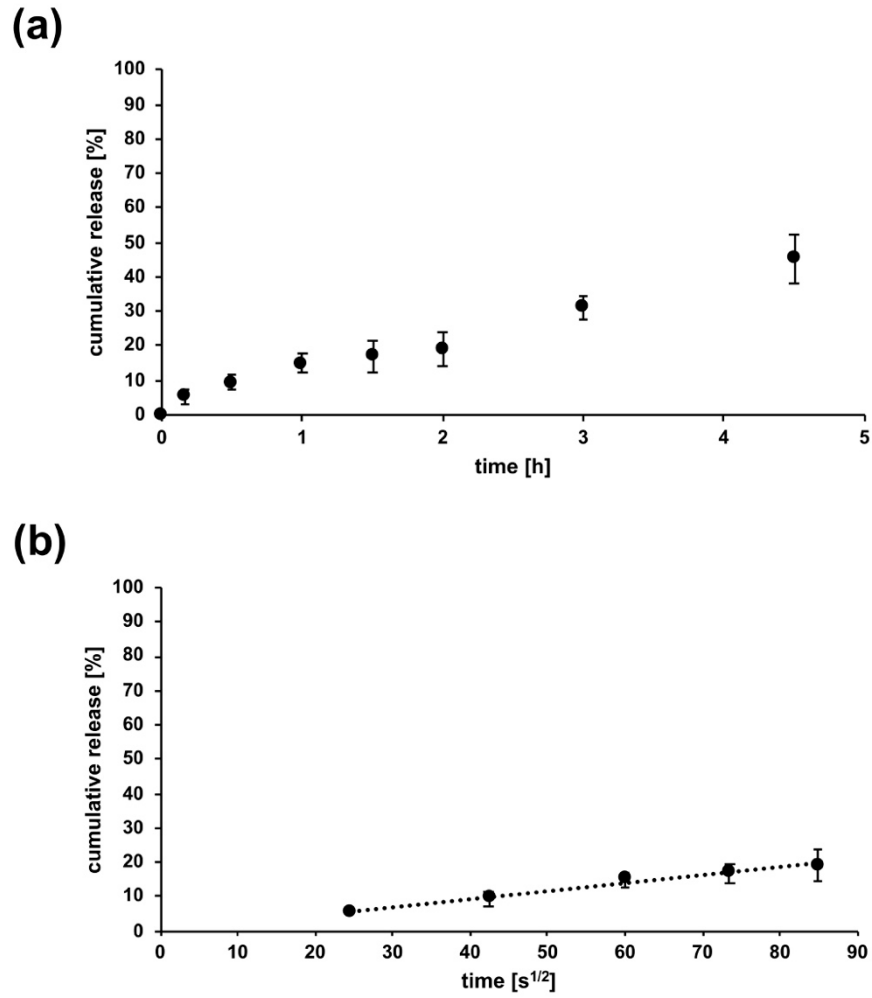

**Figure S10.** (a) FITC release profile. (b) The slope of drug release against the square root of time is representative of Fickian diffusion coefficients for each sample ( $p < 0.001$  between all groups); 20 mg/mL (black circle).
